# Supplementary figures and images for: (n, m) Distribution of Single-Walled Carbon Nanotubes Grown from a Non-Magnetic Palladium Catalyst
Source: MDPI journal article supplement (doi:10.3390/molecules28062453), 2023-03-07

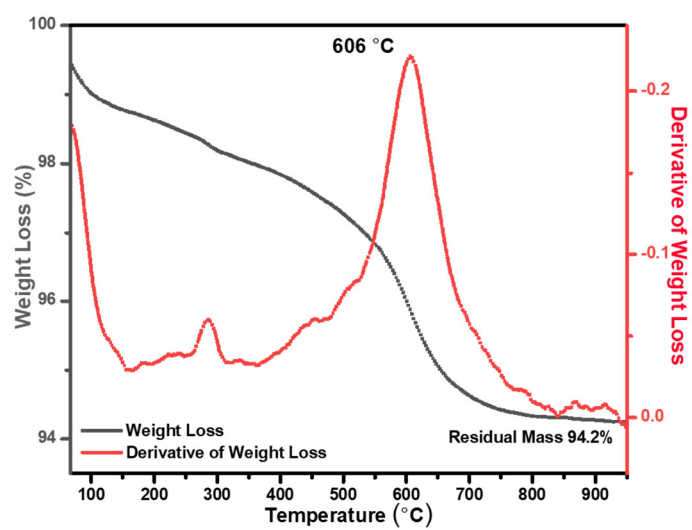

**Figure S1.** TGA profile of SWNTs grown at 900 °C on Pd@MgO catalysts.

Supplement: s1 [file s1]
